# Supplementary material for: Last 2400 yrs. Environmental changes and human activity recorded in the gyttja-type bottom sediments of the Młynek Lake (Warmia and Masuria Region, northern Poland)
Source: Copernicus journal article supplement (doi:10.5194/cp-2020-45), 2020-06-30
Supplement: Supplementary file [file cp-2020-45-AC5-supplement.pdf]

1 Last 2400 yrs. ~~Environmental~~environmental changes and human activity recorded in the  
2 gyttja-type bottom sediments of the ~~Mlynek-Lake~~Lake Mlynek (Warmia and Masuria  
3 Region, northern Poland)  
4

5 Fabian Welc (1) Jerzy Nitychoruk (2), Leszek Marks (3), Krzysztof Bińka (3), Anna Rogóż-  
6 Matyszczak (2), Milena Obremaska (4) Abdelfattah Zalat (5)  
7

8 1. Institute of Archaeology, Cardinal Stefan Wyszyński University in Warsaw: e – mail:  
9 f.welc@uksw.edu.pl.

10 2. Faculty of Economic and Technical Sciences, Pope John Paul II State Higher School of  
11 Education: e-mail: [jerzy.nitychoruk@pswbp.pl](mailto:jerzy.nitychoruk@pswbp.pl), [annarogoz@interia.pl](mailto:annarogoz@interia.pl)

12 3. Faculty of Geology, University of Warsaw: [k.binka@uw.edu](mailto:k.binka@uw.edu), [leszek.marks@uw.edu](mailto:leszek.marks@uw.edu):  
13 [k.binka@uw.edu](mailto:k.binka@uw.edu)

14 4. Polish Academy of Science, Institute of Geological Sciences, [mobremaska@twarda.pan.pl](mailto:mobremaska@twarda.pan.pl)

15 5. Tanta University, Faculty of Science, Tanta University: e-mail: [abzalat@science.tanta.edu.eg](mailto:abzalat@science.tanta.edu.eg)  
16  
17

18 Abstract  
19

20 In the densely forested Warmia and Masuria region (north-eastern Poland) there are many  
21 endorreic lakes characterized by small size, and calm-slow sedimentation ~~and lack of tributaries~~,  
22 which makes them very good Holocene environmental and paleoclimatic archives. a very good  
23 archive of environmental and paleoclimatic data for the Holocene. For this reason, ~~One~~ of them  
24 - the ~~Mlynek-Lake~~ Mlynek, located near the village of Janiki Wielkie, has been selected for multi-  
25 faceted palaeoenvironmental research based on a precise radiocarbon scale. ~~Bottom-S~~sediments of  
26 this ~~reservoir-lake~~ also contain unique information about anthropopression human impact of the  
27 environement environment, because a defensive settlement stronghold (?) has been operating on its  
28 northern shore since the early Iron Age to early Medieval period, which gives opportunity to  
29 correlate paleoenvironmental data with phases of the human activity in the last 2400 years.  
30 Between 3rd—2nd century BC the lake was surrounded by a dense forest with domination of warm  
31 and wet climate conditions. During 3<sup>rd</sup> and 2<sup>nd</sup> century BC in the warm and humid climatic

32 condition the lake was surrounded by a dense deciduous forest. In turn of 2nd century BC and 2nd  
33 century AD. From the 2<sup>nd</sup> century BC to 2<sup>nd</sup> century AD forest around reservoir the lake was much  
34 reduced, what can be associated with the first - early Iron Age - occupation phase attested on the  
35 stronghold located close to the lake. Between the 2nd – 9th century AD gradual restoration of forest  
36 and decline of human settlements is attested, along with lake deepening and onset of colder and  
37 humid climatic phase which correspond to global cooling episode known as Bond 1 (1.5 ka BP).  
38 The next intensive forest clearing around the lake occurred The Pperiod between the 9th – 13th  
39 century AD indicates again intensive forest clearing around the lake in as-result of human activity  
40 (Middle Age settlement phase on stronghold). This period is marked by a climate change towards  
41 warming, which is confirmed by the gradual lake shallowing ~~This period is characterized by~~  
42 ~~climate change towards warming, which confirms the gradual shallowing of the lake~~ (Middle Age  
43 warming period). ~~Since 13 up to the 17th century AD intensive cultivation activity around lake tool~~  
44 ~~took place. The landscape is subjected to strong human transformations which means that natural~~  
45 ~~environmental and climate changes are not so clear.~~ The strong human activity which transformed  
46 the landscape caused that the possible natural environmental changes caused by elimaclimate  
47 condition are not so clear. However, changes in lake sedimentation can be seen around 1500, which  
48 may be associated with so called Little Ice Age – cold interval. Some more visible record of climate  
49 change (cooling during Little Ice Age) can -be indicated by the changing of the sedimentation rate  
50 in the lake.

51

52

53 **Keywords:** lake sediments, Lake Młynek, environmental change, human impact, Late Holocene,  
54 Iron Age, Middle Ages.

55

56

57

## 58 **1. Introduction**

59 Lake sediments are a useful source of proxies of past environmental and climate changes  
60 in the Holocene (see Brauer, 2004; Zolitschka, 2007; Wanner et al., 2008; Francus et al., 2013;  
61 Ojala et al., 2013; Welc, 2017). The main advantage of lake sediment archives is usually continuous  
62 and; uninterrupted accumulation, which gives a chance to read(reconstruct?) the full record of

63 ~~events a relatively high and stable sedimentary rate.~~ Well-dated lake sediment columns ~~(by~~  
64 ~~radiocarbon determination for instance)~~ let to trace both long and short term Holocene  
65 palaeoclimate (Smol et al., 2001; Tiljander et al., 2002; Valpola and Ojala, 2006; Czymzik et al.,  
66 2010; Elbert et al., 2012; Tylmann et al., 2012; Welc, 2017). Particularly valuable for palaeoclimate  
67 reconstructions are sequences from lakes, without river/spring inflow and outflow (Stankevica et  
68 al., 2015). ~~In such water bodies, the sedimentation rate is relatively stable and ongoing continually~~  
69 ~~since initiation of the lakes and may contain not only continuous records of lake history but also~~  
70 ~~of its catchment~~ (Wetzel, 2001; ~~Meyers, 2003~~; Stankevica et al., 2015). In northeastern Poland as  
71 in northeastern Europe, eutrophic lakes are common. They are typical for their substantial primary  
72 production (algae and aquatic macrophytes), because of the predominance of nutrient input over  
73 mineralization processes (Cooke et al., 2005). Such intensive bio-productivity results in the  
74 deposition of thick organic sedimentary sequences, mostly of organic gyttja composed of the  
75 remains of aquatic plants, plankton and benthic organisms transformed by activity of bacteria and  
76 mixed with mineral components supplied from the lake basin (Kurzo et al., 2004; Stankevica et al.,  
77 2015). There are ca. 1000 freshwater lakes of different size in the Warmia and Mazury Region in  
78 north-eastern Poland (Fig. 1). Most of them are located in glacial tunnel valleys formed by  
79 meltwater erosion at the termination of the Vistulian (Weichselian) Glaciation (ca. 114-11 ka BP).  
80 After deglaciation at the end of the Pleistocene these tunnel valleys were partly filled with deposits  
81 and water and persisted in the Holocene. Such lake basins have steep slopes and the lake deposits  
82 are ~~underlain by~~underlie glaciofluvial sand, gravel and silt or ~~by~~ glacial till (Konracki, 2002;  
83 Gałazka, 2009). Many lakes in the Warmia and Mazury Region are small (<1 ha), with stable  
84 sedimentation rate and without river inflow and outflow. It is among the reasons that palaeoclimatic  
85 investigations, based mainly on pollen analysis are undertaken in this area (e.g., Kupryjanowicz,  
86 2008; Kołaczek et al., 2013).

87 Lake Młynek Młynek Lake, located near the village of Janiki Wielkie, has been selected  
88 for multi-faceted palaeoenvironmental research (pollen analysis, diatom, chrysophyte cyst,  
89 geochemistry... itd. and other) based on a precise radiocarbon scale, as it is hypothesized that the  
90 bottom sediments of this lake contain a unique record of human impact, as a result of the location  
91 of an Iron Age stronghold on the northern shore, which was active (though not continuously) up  
92 until the early Middle Ages (Fig. 1). ~~Performed lab analysis defined major lithofacies and the Late~~  
93 ~~Holocene phases of the lake environmental changes were distinguished, based on reconstruction~~

94 ~~of regional environmental transformations that were in turn steered by the above regional climate~~  
95 ~~change. Performed analysis provided an opportunity to reconstruct the transformation of the~~  
96 ~~vegetation around the lake and the changes in the reservoir that occurred under the influence of the~~  
97 ~~climate (regional significance) and as a result of human activity. Our Rresults were correlated with~~  
98 ~~geoarchaeological data to determine mutual relations between environmental and climatic changes~~  
99 ~~with development of human settlements in the Warmia and Mazury Region during the last 2000~~  
100 ~~years.~~

## 102 2. Study area

103 The Lake Młynek is a small water body that has occupied a glacial tunnel valley since the  
104 Holocene. The lake is located in the Iława Lakeland in northern Poland, maintains the NNE-SSW  
105 course and it is about 720 m long and 165 m wide. Lake Młynek ~~The Młynek Lake~~ occupies 7.5  
106 ha in area, its water surface rises to about 101 m a.s.l. and the maximum depth is just over 2 m.  
107 The lake is surrounded by a morainic plateau at 120-130 m a.s.l (Fig. 1). A large part of the Iława  
108 Lake District is covered with forests; meadow and synanthropic communities have a smaller share.  
109 Forests cover about 41.5% of its area. Among the habitat types, highly-productive mixed  
110 coniferous forest prevails. The transitional type of mixed forest is the most numerous among forest  
111 habitats. The basic components of the Iława forests are pine, oak, beech, alder, birch, in smaller  
112 amounts there are spruce, larch, ash, hornbeam, maple and linden. Currently, the area of the  
113 Lakeland is characterized by a transitional climate that shapes the influence of the continental and  
114 maritime climate circulation. The vegetation period lasts about 206 days, and the snow cover  
115 remains for 70-90 days. Average temperature values range from approximately -4.0 ° C in February  
116 to above 17.0 ° C in July, maximum from -1.0 ° to 22.0 °, minimum from approximately -7.0 ° to  
117 12.0 °. Due to the greater proportion of Polar Sea air masses and a large number of natural water  
118 reservoirs, air humidity is relatively high, ranging from 72% to 89%. The precipitation sums from  
119 500 to 550 mm a year. Throughout the year, SW winds predominate. The westerly winds are  
120 stronger in winter. The highest wind speeds are recorded in the winter months (from 2 to 4 m / s),  
121 and the lowest in the summer (from 2.0 to 3.0 m / s) (Jutrzenka -Trzebiatowski and Polakowski,  
122 1997, Stopa – Bryczka at al., 2013).  
123 ). It is important to note, that from the north, a small stream flows into the Lake Młynek, which is  
124 active in winter and dries up almost completely in summer (Fig. 1: D). Most probably it is an effect

125 of irrigation works related to the construction of the mill in the 15th century, somewhere in the  
126 vicinity of the medieval stronghold located on the shore of the lake (Semrau, 1935, Bińka et al.,  
127 2020).

### 129 3. Material and Methods

#### 130 3.1. ~~Ground Penetrating Radar~~ ~~Bathymetry~~ ~~Batymetry~~

131 Determination of lake bathymetry and thickness of bottom sediments are extremely  
132 important in paleolimnological research to help locate coring sites. This can be achieved through  
133 the use of GPR sounding (Lin et al., 2009; Sambuelli et al., 2009; Sambuelli and Silvia, 2012). In  
134 Poland winter is a particularly convenient season when ice cover of a lake makes ~~sounding probing~~  
135 ~~GPR profiling~~-much easier and improves access and speed of data collection (Hunter et al., 2003).  
136 Measurements along and across the lake were carried out in 2017, directly on a lake ice and a snow  
137 cover. We used the radar system ProEx of the Malå Geoscience. A radar pulse was generated at a  
138 regular distance interval of 0.02 m (900 samples were recorded from a single pulse). The time  
139 window of recording was between 250 and 300 ns. Prospection was done with use of a shielded  
140 monostatic antenna with 250 MHz nominal frequency of the electromagnetic wave.

#### 142 3.2. Coring and sampling

143 Based on the results of the GPR 4 drillings were done at ca 2 m water depth (Fig. 2) to  
144 collect cores according to ~~the~~-Givelet et al. (2004) collecting protocol. Sediment cores were ~~packed~~  
145 ~~into~~-film-wrapped ~~in~~ 1 m plastic tubes and transported to the laboratory. These cores (M1-4) were  
146 then subjected to magnetic susceptibility measurements ~~results of~~-which enabled to select ~~M1, the~~  
147 ~~longest and most continuous core, to carry out detailed analysis., the core M-1 to detailed analyses~~  
148 ~~as the longest and mostly continuous one.~~ Samples from the 3.5 m long core M-1 (geographic  
149 coordinates: 53.82486 N, 19.72419 E) were sub – sampled at 5 cm interval used for multi-proxy  
150 laboratory analyses.

#### 152 3.3. Age-depth model

153 Radiocarbon dating was performed on 4 bulk samples from the core M-1, collected either  
154 from organic-rich gyttja or gyttja with dispersed organic matter (Table 1). The organic matter  
155 seems to have been derived both from aquatic and terrestrial sources. AMS dating was done in the

156 Poznań Radiocarbon Laboratory in Poland, where  $^{14}\text{C}$  measurements were performed in graphite  
 157 targets (Goslar et al., 2004). Construction of proper and correct age-depth model required an  
 158 assessment of several agents that could disturb constant accumulation of bottom deposits of the  
 159 Lake Mlynek. Disturbances could result both from sedimentary and post-sedimentary  
 160 processes (varied rate of deposition and compaction, impact of bioturbation). The varied influx of  
 161 material delivered to the lake from the adjacent area is a very important factor of disturbance.  
 162 Therefore, a Bayesian age-depth routine mode was chosen and used, and as it takes into account a  
 163 depositionthe sedimentation rate and its variability (Blaauw and Christen, 2005; 2011; Blaauw et  
 164 al., 2007) (Fig. 4). The model was based on default settings, except for section thickness which  
 165 was set at 0.05 cm given the long-length of this core. The Bacon model uses the IntCal3 curve  
 166 (Reimer et al., 2013) to calibrate the radiocarbon data.

| <u>No.</u> | <u>Depth in m</u> | <u>Lab. reference</u> | <u><math>^{14}\text{C}</math> yr. BP</u> | <u>Age calibrated<br/>95% probability</u> | <u>Material dated</u> |
|------------|-------------------|-----------------------|------------------------------------------|-------------------------------------------|-----------------------|
| <u>1</u>   | <u>0.95-1.00</u>  | <u>S/JW 1/2015/A</u>  | <u>435 ± 30</u>                          | <u>1418 – 1494 AD</u>                     | <u>Bulk of gyttja</u> |
| <u>2</u>   | <u>1.65-1.70</u>  | <u>S/JW 1/2015/B</u>  | <u>1015 ± 30</u>                         | <u>971 – 1048 AD</u>                      | <u>Bulk of gyttja</u> |
| <u>3</u>   | <u>2.40-2.45</u>  | <u>S/JW 1/2015/C</u>  | <u>1730 ± 30</u>                         | <u>236 – 386 AD</u>                       | <u>Bulk of gyttja</u> |
| <u>4</u>   | <u>3.45-3.50</u>  | <u>S/JW 1/2015/D</u>  | <u>2275 ± 30</u>                         | <u>401 – 351 BC</u>                       | <u>Bulk of gyttja</u> |

168  
 169  
 170 3.4. ~~Pollen analysis~~ Palaeobotanical analysis?

171 3.4.1 Pollen.

172 The core M-1 was sampled every 5 cm for pollen analysis. 70 samples (ca. 10 g each) were  
 173 treated with 5% HCl, boiled in 5% KOH and hot 30% HF. They were washed with 15% HCl and  
 174 treated by the standard Erdtman's acetolysis. In each sample about 1000 pollen grains were counted  
 175 using an optical microscope at 400x magnification.

177 3.4.25 Diatom and Chrysophyte cysts analysis

178 70 samples were prepared for the analysis of diatoms and chrysophyte cysts. They were  
 179 extracted from 1 g of dry sediment of each sample using the disintegration method in HCl and  
 180  $\text{H}_2\text{O}_2$ , according to the technique proposed by Zalat and Servant-Vildary (2007). For slide  
 181 preparation, 0.1 ml of the final suspension was dried on coverslips and then mounted onto slides  
 182 using Naphrax. Diatoms were identified to species level using a Leica photomicroscope with a

183 digital camera and equipped with differential interference contrast (DIC) optics at 1000x  
184 magnification with oil immersion. Identification and ecological information of the diatom species  
185 ~~was/were~~ based primarily upon the published literature (e.g. Kilham et al., 1986; Douglas and Smol,  
186 1999; Witkowski et al., 2000; Hofmann et al., 2011). Recent taxonomic advances split many  
187 diatom taxa of the former genus *Fragilaria sensu lato* into several new genera, including  
188 *Fragilaria*, *Pseudostaurosira*, *Staurosira* and *Staurosirella* spp. (Williams and Round, 1987);  
189 these new names herein collectively referred to as *Fragilaria sensu lato*. Chrysophyte cysts were  
190 described and enumerated following Duff et al. (1995, 1997), Pla (2001) and Wilkinson et al.  
191 (2002). Preliminary results of the diatom studies based on the core M-1 were already published by  
192 Zalat et al. (2018).

193

### 194 3.5. ~~Atomic emission spectrometer (ICP-OES)~~Geochemical analysis

195 ICP-OES spectrometer was used for determination of basic (Al, Ca, Mg, Na, K, Fe, P) and  
196 trace chemical–elements (As, Cd, Mn, Th, Ti, U, V, Zn, and REE) in the analyzed samples.  
197 Powdered samples were mineralized in a closed microwave Anton Paar Multiwave PRO reaction  
198 system. Mineralization procedure was based on the procedure of Lacort & Camarero.  
199 Characteristics of lake sediments was done with the extraction method of elements soluble in  
200 aquaregia (according to European Standard CEN/TC 308/WG 1/TG 1, slightly modified). Dry  
201 samples of about 0.2 g weight were transferred to the PTFE vessel and HNO<sub>3</sub>, and HCL Merck  
202 Tracepur® was added. The vessels were placed in a rotor and loaded to a microwave. Finally, the  
203 samples were analyzed in the Spectro Blue ICP OES spectrometer at Regional Research Center for  
204 Environment, Agricultural and Innovative Technologies, Pope John II State School of Higher  
205 Education in Biała Podlaska. Berndt Kraft Spectro Genesis ICAL solution and VHG SM68-1-500  
206 Element Multi Standard 1 in 5% HNO<sub>3</sub> were used. ~~Operating parameters were as follows: number~~  
207 ~~of measurements: 3, pump speed: 30 Rpm, coolant flow: 12 l/min, auxiliary flow: 0.90 l/min and~~  
208 ~~nebulizer flow: 0.78 l/min.~~

209

### 210 3.6. Total organic carbon (TOC)

211 Analyses were done after sample acidification to remove carbonates in the SHIMADZU  
212 SSM 5000A analyzer with a solid sample combustion unit. Method: catalytically aided combustion  
213 oxidation at 900°C. Pre-acidification, oven temperature: ~~250~~200°C. Measuring range: TC: 0.1 mg



214 to 30 mg carbon. Sample Amount: 1 gram - aqueous content < 0.5 g. Repeatability: S.D. ±1% of  
215 full scale range (www.ssi.shimadzu.com/products/toc-analyzers/ssm-5000a).

216

### 217 3.7. Magnetic susceptibility (MS)

218 The cores from the ~~Lake Mlynek~~ Mlynek Lake were subjected to MS measurements using  
219 SM-30 magnetic susceptibility meter (ZH Instruments). Due to very high sensitivity ( $1 \times 10^{-7}$  SI  
220 units) this device was provided with 8 kHz LC oscillator and its pick-up coil sensor was large  
221 enough to measure sufficiently high volume of sediments with very low magnetic susceptibility.  
222 The measurements were done at every 5 cm along each core (M1-4).

223

### 224 3.8. ~~SEM/EDS~~ SEM mMicroscopic analysis

225 ~~This method was used to perform basic microscopic observations of samples of the core M-~~  
226 ~~1 with point determination of their chemical composition of major elements.~~ All selected samples  
227 were analysed using a scanning electron microscope (SEM) HITACHI TM3000 with an energy  
228 dispersive spectrometer (EDS) SWIFT ED 3000 Oxford Instruments. The samples were not  
229 covered with any conductive material. Magnification range was x 20 to x 30 000, accelerating  
230 voltage 5-15keV. This method was used to perform basic microscopic observations of samples of  
231 the core M-1 with point determination of their chemical composition of major elements.

232

### 233 3.10. Archaeological records

234 ~~Archaeological records from the stronghold Janiki Wielkie, built on a hill at the north-~~  
235 ~~eastern shore of the Mlynek Lake in the early Iron Age referred to successive human phases~~  
236 ~~detected in the lake sediments, connected with intensified activity of a man near the lake. During~~  
237 ~~archaeological research carried out in 2013 and 2016, a total of 143 stratigraphic units were~~  
238 ~~distinguished, which were divided into seven main settlement phases: phase I-early Iron Age, phase~~  
239 ~~II-leaving the stronghold from the early Iron Age, phase III-early Middle Ages, phase IV-leaving~~  
240 ~~the stronghold in the early Middle Ages, phase V settlement activity on the stronghold in the 11th-~~  
241 ~~13th century and the last VI phase which is marking finale leaving of the stronghold in the 14th~~  
242 ~~century (Rabiega et al., 2017, Nitychoruk and Welc, 2017)~~

243

## 244 4. Results



#### 245 4.1. Archaeological records

246 Archaeological records from the stronghold Janiki Wielkie, found on a hill at the north-  
247 eastern shore of the Młynek Lake in the early Iron Age referred to successive human phases  
248 detected in the lake sediments, connected with intensified human activity near the lake. During  
249 archaeological research carried out in 2013 and 2016, a total of 143 stratigraphic units were  
250 distinguished, which were divided into seven main settlement phases: phase I-early Iron Age, phase  
251 II-leaving the stronghold from the early Iron Age, phase III-early Middle Ages, phase IV-leaving  
252 the stronghold in the early Middle Ages, phase V-settlement activity on the stronghold in the 11th-  
253 13th century and the last VI phase which is marking finale leaving of the stronghold in the 14th  
254 century (Rabiega et al., 2017, Nitychoruk and Welc, 2017)

#### 255 ~~4.2:~~

#### 256 *Bathymetry*

257 A georadar transect across the lake reflects both its bathymetry and lithologic variety of its  
258 bottom (Figs. 2 - 3). The superficial layer is ~~composed of an ice cover~~covered by ice, ca 25 cm  
259 thick and although it is almost not visible on radar images due to its thickness being smaller than a  
260 vertical resolution of measurements, there are beneath abundant horizontal multiple reflections of  
261 energy from the bottom of the ice. Two narrow and vertical zones with small diffraction hyperboles  
262 at 23 and 29 m of the transect indicate upward deformation of bottom sediments at the location  
263 sites of the sounding core and the core M-1 (Fig. 3a). The top of the underlying mineral deposits  
264 (so-called hard bottom) is indicated as a distinct downward-deflected reflection surface (Fig. 3b).  
265 In a central part of the lake it occurs at 2.6 m depth (two-way travel time 290 ns) and indicates the  
266 top of the Holocene organic sediments. Unfortunately, beneath there is a signal-absorption zone  
267 (Fig. 3d), resulting from the fact that most sediments are composed of fine-grained organic material  
268 (gyttja). However, thickness of this layer was determined by drillings to about 5 m. A relief of the  
269 lake bottom in the GPR image reflects a cross-section of a glacial tunnel valley that was eroded  
270 mainly in sandy and sandy-gravel deposits. Close to the lake shore (0 to 20 m in the northwest and  
271 110 to 140 m in the southeast) ~~in this section~~ there are numerous oblique and chaotically parallel  
272 reflection surfaces dipping towards the channel axis. They reflect bedding of the Pleistocene sandy-  
273 gravel series that partly filled a subglacial channel (Fig. 3c).

276 4.32.

277

#### 278 *Age-depth model*

279 ~~Obtained~~ The age-depth model of the core M-1 from ~~the Mlynek Lake~~ Lake Mlynek ~~present~~  
280 ~~calibrated distributions of the individual dates (blue) (is shown in~~ Fig. 4). Grey stippled lines show  
281 95% confidence intervals and the red curve shows the ‘best’ model based on the weighted mean  
282 age for each depth. Good runs of a stationary distribution are shown in the upper left panel, green  
283 curves and grey histograms in the upper middle panel present distributions for the sediment  
284 accumulation rate ~~and memory is indicated in the right panel~~. The main bottom panel shows the  
285 calibrated <sup>14</sup>C dates (transparent blue) and the age-depth model (darker gray areas) which are  
286 indicating calendar ages.

287

288 4.34.

289

#### 290 *Lithology of the lake sediments*

291 Deposits in the Mlynek Lake are organic-rich. The core M-1 is composed of gray-brown  
292 gyttja at depth 1.8-3.6 m (Fig. 5). On depth 1.45-1.80 m dominated ~~graygrey~~-brown ~~peatygyttja~~  
293 detritus ~~gyttja~~. At 1.10-1.45 m was recorded ~~very plastic~~—algal gyttja. The uppermost part of the  
294 core is composed of ~~graygrey~~-brown (depth 0.4 -1.1 m) and ~~hydrated~~-detritus ~~type~~ gyttja (0.0-0.4  
295 m).

296

297 4.45.

298

#### 299 *Sedimentary Sedimentation rate*

300 The sedimentation rate was calculated based on the age-depth model ~~(Fig. 5)~~. Results reflect  
301 quite a stable sedimentary environment with a general rate of 1.5 mm a year. ~~There are however~~  
302 ~~parts of the core with a higher or lower rate at 3.46-2.42 m~~. The rate is stable and equal ca 1.5 mm  
303 a year, at 2.42-1.77 mm, drops to 1 mm, then rises at 1.77-0.30 m to 1.3-1.8 mm a year. At 0.0-  
304 0.30 m the sedimentary rate is the highest and equal ca 3 mm a year ~~(Fig. 5)~~.

305

307

308 *Magnetic susceptibility and total organic carbon*

309 The MS of deposits is highly dependent on their lithological composition and grain size  
310 content (Dearing, 1994; Sandgren and Snowball, 2001). It reflects not only presence but also size  
311 of ferromagnetic particles in a sample (Verosub and Roberts, 1995). Increased content of  
312 ferromagnetic minerals such as magnetite, Fe-Ti oxides or pyrrhotite generates higher MS, whereas  
313 biotite, pyrite, carbonates and organics result in ~~their~~ lower values. Total volume of magnetic  
314 minerals in lake sediments reflects mostly climatic change in a catchment (Bloemdal and  
315 deMenocal, 1989; Snowball, 1993; Peck et al., 1994).

316 The core M-1 shows MS differentiations but due to organic character of the sediments (Fig.  
317 2), its values are relatively low, from 0.002 to  $0.034 \times 10^{-7}$  units SI. At 3.50-2.58 m, MS rises and  
318 drops in turn from 0.01 to  $0.02 \times 10^{-7}$  SI, which partially corresponds to a grey-brown gyttja with  
319 organic matter. MS drops at depth 2.60-1.89 m, reaching a minimum at 1.63 m. Higher up, MS  
320 rises again reaching the highest value at 1.35 m, then there is a minimum at 1.05 m and the next  
321 maximum at 0.69 m.

322 Magnetic susceptibility is generally low in biogenic sediments as gyttja, which is composed  
323 mainly of microfossil skeletons e.g. diatoms and radiolarians (Thompson and Oldfield, 1986). In  
324 [Lake Mlynek](#) ~~Mlynek Lake~~ there is an apparent negative relationship between TOC and MS.  
325 Several intervals show both higher percentages of TOC and lower MS values. At 1.40 m, TOC  
326 indicates a sudden drop, probably due to deforestation and MS is significantly rising due to  
327 increasing input of terrestrial (non-organic) material to the lake. Such coincidence clearly indicates  
328 that TOC is both autochthonous and allochthonous (Fig. 6)

329 Changes in MS in sediments of the [Lake Mlynek](#) ~~Mlynek Lake~~ sediments are related most  
330 probably to input of clay into the lake and diagenetic conditions in bottom sediments. Iron oxides  
331 in the [Lake Mlynek](#) ~~Mlynek Lake~~ are most probably of detrital origin and were delivered to the  
332 basin through incised deep valleys located at the northwestern shore. Concentration of  
333 ferromagnetic minerals is connected with periodical intensified soil erosion around the lake. Higher  
334 content depends also on diagenetic processes in bottom sediments. Oxidation of organic matter in  
335 anoxic conditions (by iron-oxide-reducing bacteria) results usually in increased content of

336 ferromagnetic particles (small particles are removed first). In opposite, oxygenation by heavy  
337 floods stops this process and small magnetic particles are preserved (Jelinowska et al., 1997).

338

#### 339 4.67. *Water-soluble ions*

340 Various factors influence distribution and accumulation of geochemical elements in the lake  
341 sediments. Most important are texture, mineral composition, oxidation/reduction state,  
342 absorption/desorption and physical transportation processes (Ma et al., 2016). Curves of  
343 representative elements are generally used to characterize sedimentary environments. Most  
344 analysed elements do not indicate any clear trend with depth in the [Lake Młynec](#). The  
345 curves of S and TOC show significant rises at 2.0-1.4 m that are slightly correlated with decreased  
346 contents of Al, Fe, K, Ca, Mg and magnetic susceptibility (Fig. 6).

347 Sulphur content is correlated with existence of iron sulphides. ~~SEM/EDS analysis indicated~~  
348 ~~occurrence of both phramboidal pyrite and euhedral crystals, characterized as an octahedral~~  
349 ~~crystallized form (Fig. 8). Euhedral crystals are formed as syngenetic in euxinic conditions~~  
350 ~~(Sageman and Lyons, 2003; Berner et al., 2013; Ivanić et al., 2018), whereas phramboidal ones are~~  
351 ~~typical for early diagenetic pyrite but they can still occur as syngenetic ones (Goldhaber, 2003).~~  
352 ~~Phramboids in the examined core are noted at various depths, but they are more common if the~~  
353 ~~TOC content is higher.~~ In the studied core, Fe is positively correlated with Al and Ti (Fig. 8 and  
354 table 2). Fe-Ti oxides are noted in SEM EDS analysis. They are resistant to surface weathering and  
355 carry trace elements (Bauer and Velde, 2014). At ca. 3 m, high frequency peaks of Al, K, Ca, Na,  
356 Mg, Fe and S occur (Fig. 6). Such occasional high intensity events leave a stronger geochemical  
357 imprint, because of sedimentation in shallow water (Ivanić et al., 2018). The highest contents of  
358 detrital elements like Al, K, Ca and Mg should be associated with sudden delivery of clastic  
359 material to the lake e.g. during increasing flood or rainfall (Wirth, et al., 2013). Especially Al is  
360 extremely immobile, that is why it should be regarded as a typical lithogenic element (Price et al.,  
361 1999). Additionally, Al is a major constituent of soils and other sediments as a structural element  
362 of clays. It has a strong positive correlation with many major elements (Fig. 8 and Tab. 2). The  
363 association between Al and other elements can be therefore used as a basis for the comparison of  
364 natural elemental content in sediments and soils. ~~Most elements like Al, K, Fe and Mg are from~~  
365 ~~terrigenous inputs to the lake.~~ Ca is correlate with Al and originated mainly from terrigenous  
366 bicarbonate inputs and was deposited in the lake as a solid carbonate (Miko et al., 2003). Calcium

367 is evidently more easily removed in solution from a mineral material and it is highly concentrated  
368 in highly erosional periods (Mackereth, 1965).

369 The Fe/Ca ratio is considered as ~~the~~an eutrophication proxy. The highest ratio points out  
370 to low oxygenation, eutrophic or dystrophic reservoirs (i.e. Kraska and Piotrowicz, 2000; Holmes  
371 and De Decker, 2012), whereas the low Fe/Ca ratio in bottom sediments indicates oligotrophic  
372 character of a lake. In the studied core sediments, Fe/Ca ratio varies from 0.808 (depth 3.05 m) to  
373 3.677 (1.2 m). The ratio is low, indicating oligotrophic conditions in bottom sediments which gives  
374 conflicting results with other data. The Fe/Ca ratio can be disturbed by detrital input to the lake  
375 (Fig. 6).

376 The Mn/Fe ratio is low (0.004 -0.19) in all studied ~~cores~~samples and reflects lower O<sub>2</sub>  
377 concentration in a water column (e.g. López et al., 2006; Naeher et al., 2013), which is typical for  
378 eutrophic lakes. The ~~extremely~~ low value (0.004) at depth 3.05 m is probably a response to Fe  
379 delivery with terrigenous material. The dysaerobic conditions are also confirmed with Th/U ratios  
380 (0.03-0.41) which are lower than the critical value of 2 as indicated by Myers and Wignall (1987)  
381 and Wignall (1994).

382 The ratio of total Fe to total P ranges from 13.91 (1.6 m) to ~~43.76 (3.05 m)~~30.82 (0.55m).  
383 The values are typical for other lakes in northern Poland, which vary from 3 to 180 according to  
384 Bojakowska (2016). The release of P follows in reducing conditions. According to Ahlgren et al.  
385 (2011) is even up to ten times greater than in aerobic conditions. However, there is a poor  
386 correlation with other redox proxies i.e. Th/U (R=0.08). It can be caused by presence of Al which  
387 forms Al(OH)<sub>3</sub>. In such systems even though the redox state favors release of P from iron minerals,  
388 the P is immobilized by binding with hydroxides. Thus, the presence of Al(OH)<sub>3</sub> can stop release  
389 of P even in an anoxic hypolimnion (Hupfer and Lewandowski, 2008). It can be a case in the  
390 studied sediments as Al shows positive correlation with P content (R=0.49). Except for Fe/Ca, all  
391 counted ratios point out to anoxic conditions in all studied ~~cores~~samples which is typical to  
392 eutrophic lakes. Nevertheless, as all proxies are characterized by extreme values at the 3.05 m, they  
393 seem to depend on external load of terrigenous material. It is confirmed with very good positive  
394 correlation between Fe and Al (0.95), Fe and Ti (0.64) Mn and Al (0.46) or Mn and Ti (0.78).  
395

396 4.78.

397  
398 *Diatoms and chrysophyte*  
399

400 Studies of the Lake Mlynek bottom sediments revealed presence of more than 200 diatom  
401 taxa belonging to 54 genera (Zalat et al., 2018) (Fig. 9). Diatoms were generally abundant and well  
402 to moderately preserved in most samples, although with admixture of mechanically broken valves,  
403 especially in the topmost part of the core. Results of the diatom analysis and relative abundance of  
404 the most dominant taxa enabled subdivision of the M-1 core section into ~~6-11~~ diatom assemblage  
405 zones (Fig. 9) that reflected six phases of lake development (Zalat et al., 2018). Moreover, changes  
406 in chrysophyte cysts distributions along with variation in diatom composition could be related to  
407 changes in pH, climate and trophic status. Stomatocysts can be used as the index of lake-level  
408 changes, habitat availability, metal concentrations and salinity. The periphytic diatom species  
409 dominate the planktonic ones throughout the core. ~~The main change in diatom composition is~~  
410 ~~indicated by a shift from the assemblage dominated by periphytic species through marked intervals~~  
411 ~~to a planktonic one.~~ A high proportion of periphyton to plankton assemblages was reported as  
412 indicative for a long-lasting ice-cover (Karst-Riddoch et al., 2005) whereas a shift from benthic to  
413 planktonic diatom taxa is considered for an ecological indicator that is generally interpreted in  
414 high-altitude lakes as record of shorter winter and increased in temperatures. Common occurrence  
415 of benthic forms represented by *Staurosira venter*/*Staurosirella pinnata* diatom assemblage  
416 indicates circumneutral to slightly alkaline shallow water with lowering lake levels and prolonged  
417 ice cover. However, *Aulacoseira* is the most dominant planktonic genus followed by *Cyclotella*  
418 and low frequency of *Cyclostephanos*. ~~High abundance of eutraphentic planktonic taxa in some~~  
419 ~~interval denotes lake productivity and nutrient concentrations tend to increase with rising water~~  
420 ~~temperature. The marked fluctuations in the abundance of the periphytic to plankton assemblages~~  
421 ~~along the core section explained relative water level changes associated with climate change.~~

422 Diatom preservation in the upper part of the core (depth 1.40 -0.15 m) is moderate to  
423 relatively poor and the recognized assemblage was represented by the occurrence of some  
424 dissolved and teratological diatoms valves, in particular the topmost part of the core section (0.30-  
425 0.15 m). ~~Such dissolution and deformed diatoms may reflect a dramatic decline in water quality,~~

426 ~~variations in lake chemistry and shallowness environment, beside the increase in human activity~~  
 427 ~~and anthropogenic nutrient additions to the lake system~~ (Zalat et al., 2018).

428

429 4.89.

430

431 *Pollen*

432 ~~Based on percentage of main trees and terrestrial herbs f~~Five local pollen assemblage zones  
 433 (LPAZ M1-M5) were established in the pollen sequence of the ~~Lake Mlynek Mlynek Lake. They~~  
 434 ~~reflect regional as well as local vegetation changes, with varied ratios of arboreal (AP) and non-~~  
 435 ~~arboreal (NAP) pollen that indicate environmental oscillations~~ (Fig. 10):

436

| <u>Zone</u>               | <u>Depth [m]</u>            | <u>Main features of pollen spectra</u>                                                                                                                                                                                                                                                                                                                                                                                                                                                                                                                              |
|---------------------------|-----------------------------|---------------------------------------------------------------------------------------------------------------------------------------------------------------------------------------------------------------------------------------------------------------------------------------------------------------------------------------------------------------------------------------------------------------------------------------------------------------------------------------------------------------------------------------------------------------------|
| <u>LPAZ</u><br><u>M-1</u> | <u>340÷320</u><br><u>cm</u> | Pollen grains of <i>Carpinus</i> reached a <u>max.33,5%</u> and <i>Alnus</i> , <u>ca. 25%</u> .<br>Percentages of <i>Pinus</i> and <i>Betula</i> below 20%.<br>Presence of single(?) pollen grains of <i>Cannabis/Humulus</i> and <i>Urtica</i> .<br>Top of border marked by <i>Carpinus</i> -decline.                                                                                                                                                                                                                                                              |
| <u>LPAZ</u><br><u>M-2</u> | <u>320÷270</u><br><u>cm</u> | The share of <i>Carpinus</i> very strong decrease (below 10%). The curve of <i>Betula</i> , <i>Quercus</i> and <i>Corylus</i> slightly raised. Significantly increased the percentages of Gramineae up to <u>7,5%?</u> . At this zone appeared continuous curves of <i>Cannabis/Humulus</i> , <i>Chenopodiaceae</i> , <i>Plantago lanceolate</i> , <i>Rumex acetosella</i> and <i>Secale cereale</i> .<br>Top border marked by Gramineae decline.                                                                                                                   |
| <u>LPAZ</u><br><u>M-3</u> | <u>200÷270</u><br><u>cm</u> | At the beginning the curve of <i>Betula</i> raised (up to <u>24%</u> ) but then declined (below 10%). The share of <i>Carpinus</i> and <i>Fagus</i> increased and reached <u>19%</u> of hornbeam pollen grains and a max. <u>27%</u> of beech tree respectively. The value of Gramineae decreased below 2%. The curves of <i>Secale cereale</i> , <i>Plantago lanceolate</i> and <i>Rumex acetosella</i> disappeared. Only single pollen grains of <i>Chenopodiaceae</i> and <i>Cannabis/Humulus</i> were present.<br>Top border marked by increasing of Gramineae. |



|                           |                             |                                                                                                                                                                                                                                                                                                                                                                                                                                                                                                                                                                                                                                                                                                                                                                                                                     |
|---------------------------|-----------------------------|---------------------------------------------------------------------------------------------------------------------------------------------------------------------------------------------------------------------------------------------------------------------------------------------------------------------------------------------------------------------------------------------------------------------------------------------------------------------------------------------------------------------------------------------------------------------------------------------------------------------------------------------------------------------------------------------------------------------------------------------------------------------------------------------------------------------|
| <u>LPAZ</u><br><u>M-4</u> | <u>200÷145</u><br><u>cm</u> | <u>Percentages of <i>Fagus</i> began gradually decrease. The share of pollen grains of <i>Betula</i> increased and was stable between 22-27%. The pollen grains of Gramineae value increased again (ca. 7%). Once more the curves of <i>Cannabis/Humulus</i>, <i>Plantago lanceolate</i>, <i>Rumex acetosella</i> and <i>Secale</i> raised.</u><br><u>Top border marked by rapid increasing of <i>Cannabis/Humulus</i>.</u>                                                                                                                                                                                                                                                                                                                                                                                         |
| <u>LPAZ</u><br><u>M-5</u> | <u>145÷15 cm</u>            | <u>The curves of all main deciduous trees declined: <i>Carpinus</i> below 9%, <i>Fagus</i> below 5%, <i>Quercus</i> below 5%, <i>Alnus</i> below 15%, <i>Betula</i> below 14%. In this zone the percentages of <i>Pinus</i> increased and reached max. ca. 40%.</u><br><u>Significantly raised the share of Gramineae (up to 15%). Percentages of <i>Cannabis/Humulus</i> reached absolute maxima (25%?) but close to middle part of this zone strongly decline (below 2-3%). The value of <i>Secale</i> reached 5%. The continuous curves of <i>Cerealia undiff.</i>, <i>Centaurea cyanus</i>, <i>Plantago lanceolate</i>, <i>Rumex acetosella</i>, <i>Rumex acetosella</i> appeared, and the pollen grains of <i>Polygonum dumentorum</i>, <i>Polygonum aviculare</i> and <i>Urtica</i> were visible present.</u> |

437

## 438 **5. Discussion**

### 439 **Mlynek Lake phases of environmental transformation and human activity**

440 Based on results of lithological, geochemical, palynological and diatomological analysis-  
 441 supplemented by archaeological data, 5 main environmental phases of the Lake Mlynek  
 442 development were distinguished (Fig. 11). Radiocarbon ages supplied with detailed chronology  
 443 whereas pollen data and stratigraphy of the stronghold to the north-east of the lake enabled  
 444 correlation of human activity with environmental data during the last 2400 years.

445

#### 446 *5.a. Phase 1: ca. 2300 – 2100 cal. BP (3.45-3.15 m)*

447 This phase ~~corresponds to~~ recorded in -LPAZ M-1 which represents closed deciduous  
 448 forest communities with dominated hornbeam and oak domination. Well developed riparian forest  
 449 with alder colonized marshland near the lake shore. by hornbeam and alder. The lake hydrology  
 450 was stable and it was quite shallow (Fig. 11). This phase corresponds to LPAZ M-1 which

451 ~~represents closed forest communities dominated by hornbeam and alder. These species colonized~~  
452 ~~marshland near the lake shore.~~ Open plant communities ~~sy plants and indicators of anthropogenic~~  
453 ~~activity (e.g. *Plantago lanceolata*) are were~~ rare, and vegetation around the lake was natural and  
454 not disturbed. Diatom assemblage at the beginning of the diatom subzone DZ1 (depth 3.45-3.40  
455 m)(Fig. 9) indicates a shallow and slightly alkaline lake environment, followed (3.35-3.15 m) by a  
456 rising lake level. Common occurrence and domination of *A. granulata* suggests high trophic status  
457 of slightly alkaline freshwater environment with high silica concentration (Zalat et al., 2018). MS  
458 during this phase is high and it corresponds to high content of Fe, Ti and Al, indicating increased  
459 influx of terrigenous material to the lake, presumably activated by more intensive rainfall. **Higher**  
460 **TOC suggest (intensive production of biomass in the lake) relatively wet and warm climatic phase.**

461

462 5.1. Phase 2: **ca. 2100 – 1830 cal. BP** (3.15-2.75 m)

463 During phase 2 the vicinity of the lake This is the period of began to change. The major  
464 changes in the environment around the lake, with were caused by significant anthropogenic-human  
465 impact. Phase corresponds with the LPAZ M2, characterized by reduction and fragmentation of  
466 the hornbeam-dominated forest. Birch, pine and hazel expanded under better lighting conditions in  
467 a partially open forest whereas oak increase was caused only by higher production of pollen. Mid-  
468 forest pastures occupied rather small-scale open areas, as can be seen from higher percentages of  
469 *Plantago lanceolata* and other herbaceous plant-e.g. Gramineae, *Artemisia*, *Rumex*  
470 *acetosa/acetosella*. Cultivated plants-*Cannabis* t., and *Secale* are rarely noted, however their  
471 occurrence is entirely consistent with the other indicator present during this phase. Human  
472 occupation is attested by presence of *Cannabis/Humulus*, *Plantago lanceolata*, *Rumex acetosella*,  
473 *Secale* and cereals undiff. This period is similarly expressed and commonly noted in numerous  
474 palynological sequences in the neighboring area (see for example Noryśkiewicz, 1982, 1987, 2013;  
475 Bińka et al., 1991; Ralska-Jasiewiczowa et al., 1998). Pollen data indicate that societies of that time  
476 cultivated rye and probably hemp. It is the oldest settlement phase at Janiki Wielkie hillfort that  
477 corresponds to the end of the La Tène and the early Roman period (1st century BC/1st century AD.  
478 Human communities of this time living in the vicinity of the lake can be connected with settlements  
479 of the East-Baltic Kurgan Culture (Rabiega et al., During this phase, planktonic diatoms were  
480 replaced by benthic taxa accompanied by *Gyrosigma acuminatum*, which indicates lowering of the  
481 lake level and dominance of mesotrophic alkaline freshwater environment. The lower stands were

482 interrupted by short rising water level episode at 2.90–2.85 m (Zalat et al., 2018). ~~Low water level~~  
483 ~~is also confirmed by high frequency peaks of Al, K, Ca, Na, Mg, Fe, V, Cd and S, resulting from~~  
484 ~~delivery of elastic material to the lake, due to reduction of vegetation (cf. Wirth et al., 2013).~~  
485 ~~Presence of pollen taxa as *Plantagolanceolata*, *Rumexacetosella*, *Secale* and *cerealia undiff.*,~~  
486 ~~demonstrates human occupation in the vicinity of the lake. Pollen data indicate that societies of~~  
487 ~~that time cultivated rye and probably hemp. It is the oldest settlement phase at Janiki Wielkie~~  
488 ~~hillfort that corresponds to the end of the La Tène and the early Roman period (1st century BC/1st~~  
489 ~~century AD. Human communities of this time living in the vicinity of the lake can be connected~~  
490 ~~with settlements of the East Baltic Kurgan Culture (Rabiega et al., 2017).~~

491 During ~~phase no. 2~~ this period climatic conditions were still similar to ~~these forms~~ previous  
492 phase, but more dry - what is reflected by a shallowing of the lake. ~~This relatively wet and warm~~  
493 ~~climatic phase~~ This time should be correlated with so called Roman Climatic Optimum (see.,  
494 McCormick et al., 2012).

#### 495 496 5.2. Phase 3: 1830 – 1150 cal. BP (2.75-1.95 m)

497 ~~This is the level of dynamic recovery reconstruction of forest communities. Phase 3 is recorded~~  
498 ~~in the pollen spectra LPAZ M3. During this time forest restoration took place. Absence of human~~  
499 ~~impact indicators indicators plants shows decline in populations residing in catchments suggest that~~  
500 ~~the settlement in the catchment area were abandoned. In this phase there are no traces of human~~  
501 ~~activity nearby (Rabiega et al., 2017). Reduction of settlements human impact and semi-open~~  
502 habitats generated by ~~them it~~, allowed for short term expansion of birch into ~~abandoned empty, and~~  
503 open areas, and then replaced by hornbeam rebuilding its position to the level observed in the pollen  
504 zone M1. Also, elm and ash expand again into riparian forest. ~~All this resulted in a decrease in the~~  
505 ~~birch, pine and hazel content. All this caused decline of content of birch, pine and hazel. During this~~  
506 ~~natural restoration of forest the abrupt expansion of beech followed (the second half of the~~  
507 ~~zone LPAZ M3) we can observe abrupt expansion of beech. The area of open hHerbaceous plants~~  
508 ~~communities, the previously abundant, - was limited. (has shrunk?) in the previous zone are only~~  
509 ~~sporadically noted. At that time in the lake were Diatom phase 3 (2.70-2.45 m) present great~~  
510 abundance of planktonic diatoms (Fig.9) what indicates deepening of the lake, enhanced thermal  
511 stratification, reduced mixing and increased thermal stability (Zalat et al., 2018). ~~Such gradual rise~~  
512 ~~of humidity and cooling resulted in increased~~ Intensified development of vegetation cover and

513 higher lake water level, ~~and it~~ is supported by geochemical indices. There is also a gradual drop in  
514 MS, corresponding with decreased content of detrital elements as Fe, Ti, Al and K, accompanied by  
515 gradually a rise of an increase in TOC and ~~of the~~ proxy ratio Fe/Ca. Lower MS and content of Al  
516 (acting as a major constituent of soils) with higher TOC suggests ~~extension of vegetation cover,~~  
517 ~~resulting in~~ limited erosion in spite of gradually higher precipitation in the lake catchment and  
518 therefore, rise of its water level. ~~In this phase there are no traces of human activity at the settlement~~  
519 ~~nearby (Rabiega et al., 2017).~~

520 The climate in phase 3 is gradually changing towards ~~cooler, but also~~ more humid. There is an  
521 increase in rainfall and a decrease in evaporation, which is reflected in lake sedimentation, where  
522 the lake deepens, resulting in a reduction in the sediment installment deposition showing less  
523 productivity and greater lake stability. This phase ~~should~~ could be associated with the global  
524 cooling episode known as Bond 1 (1.5 ka BP) (see., Bond et al., 1997; Welc, 2019)

525

#### 526 5.3 Phase 4: 1150 – 780 cal. BP (1.95-1.45 m)

527 Phase no. 4 is correlated with palynological zone M4 and was divided into two subphases 4a  
528 and 4b (Fig. 11). The lower boundary (subphase 4a) of this zone marks the onset of another  
529 settlement phase and as a result clearing of the forests of similar magnitude as in the M2 pollen  
530 zone. First of all, disturbances took place in beech forest and to a lesser extent in these dominated  
531 by hornbeam. ~~Also, in this zone, birch and less intensively poplar occupied temporarily abandoned~~  
532 ~~open areas (especially toward the end of the zone, when the human activity is lower). Alder, in~~  
533 ~~the second part of the zone increased in abundance, probably expanding into exposed marginal~~  
534 ~~areas of the lake.~~ The level of anthropogenic activity is only slightly lower to that demonstrated in  
535 M2 zone and reflected by the presence of Gramineae, *Artemisia*, *Cannabis/Humulus*, *Plantago*  
536 *lanceolata*, *Rumex acetosella*, *Secale* and cerealia undiff. Diatom assemblages indicate a  
537 deepening of the lake (Zalat et al., 2018). ~~In this time synanthropic plants disappear and they come~~  
538 ~~back again in the early Middle Ages about 700 AD.~~ This is documented by the great abundance  
539 of *Aulacoseira* species associated with *Puncticulata radiosa* in the upper part of diatom zone 5 at  
540 1.85-1.70 m. The diatom assemblage suggests episode of relative rising lake level, increased  
541 trophic state of the lake and stronger turbulent mixing conditions. Moreover, the greatest reduction  
542 of abundance *Fragilaria sensu lato* accompanied by a high abundance of *A. granulata* could have  
543 resulted from forest clearings around the lake caused by settlers. Higher TOC corresponds with

544 lower content of detrital material (Fe, Ti, Al and K) and lower MS, and it can be interpreted as  
545 progressing humidity (Fig. 6). This phase can be correlated with the Migration Period and the early  
546 Middle Ages. At the end of the phase 4 during the early Middle Ages, in the settlement close to  
547 the lake (archaeological phase III) after removal of the layers formed by natural development of a  
548 soil (due to abandonment of the site in the early Roman Period) a defence rampart was raised. At  
549 its upper surface a wooden-loamy wall was constructed. After short period this stronghold was  
550 destroyed. A charcoal from a fired wall represents this destruction phase at the end of the Phase  
551 IIIA was dated at  $1245 \pm 25$  cal. BP i.e. 682-870 AD (95,4% probability) and  $1090 \pm 30$  cal. BP  
552 i.e. 892-1014 AD (95,4% probability) (Rabiega et al., 2017).

553 Subphase 4b (1.70–1.45 m) During subphase 4b (1.70-1.45 m), towards the end of this phase  
554 some decline in intensity of human impact is observed. Synanthropic plants gradually disappear  
555 and they come back again in the early Middle Ages about 700 AD. At this time birch and less  
556 intensively poplar occupied temporarily abandoned open areas (especially toward the end of the  
557 zone, when the human activity is lower). Similar - alder, at that time increased in abundance,  
558 probably expanding into exposed marginal areas of the lake. marks the onset of another settlement  
559 phase, resulting in further forest clearing around the lake and increase in birch invading into open  
560 areas. In this period alder which expanded into exposed marginal areas increased in abundance. ).  
561 This is documented by the great abundance of *Aulacoseira* species associated with *Puncticulata*  
562 *radiosa* in the upper part of diatom zone 5 at 1.85–1.70 m. The diatom assemblage suggests episode  
563 of relative rising lake level, increased trophic state of the lake and stronger turbulent mixing  
564 conditions. Moreover, the greatest reduction of abundance *Fragilaria sensu lato* accompanied by  
565 a high abundance of *A. granulata* could have resulted from forest clearings around the lake caused  
566 by settlers. In this time alder increased its abundance as it probably expanded into exposed  
567 marginal areas of the lake. The anthropogenic activity, expressed by presence of herbaceous plants  
568 (including cereals) Gramineae, *Artemisia*, *Cannabis* t., *Plantago lanceolata*, *Secale* and cerealia  
569 undiff. as well as by forest clearings is only slightly lower than in the zone M2 and generally it  
570 resembles those in the Roman Period. Towards the end of this phase some decline in intensity of  
571 human impact is observed.

572 Subphase 4b corresponding to diatom zone 6 which is characterized by high abundant benthic  
573 *Fragilaria sensu lato* species with sporadic occurrence of planktonic taxa. The diatom assemblage  
574 reflects lowering water level and slight alkaline freshwater, lower nutrient concentrations, low

575 silica content (Zalat et al., 2018). In the strongholds at the lake shore, the next human activity  
576 phase took place at the end of the 11th century AD when a new rampart was raised. Wooden  
577 constructions were also built, traces of which were excavated in the area of the gate passage. The  
578 settlement was finally abandoned presumably in the first half of the 13<sup>th</sup> century and then, its  
579 ramparts were strongly eroded, with their material moving towards the yard and the moat (Rabiega  
580 et al., 2017). After the early Middle Ages, the area around the lake was occupied by the Prussian  
581 tribe of Pomezanians and this region named Geria was a borderland. It consisted of network of  
582 strongholds located among others at Bądko, Urowo, Wieprz and Kraga (Szczepański, 2009). In the  
583 south the tribe bordered directly with the Slavic settlement, which includes two strongholds located  
584 around 30 km away from Janiki at Łanioch near the Silm Lake in the SSE and Zajączki near  
585 Ostróda in the SE (Grażawski, 2006).

586 Phase 4 is marked by continuation of previous climatic conditions, ~~which are gradually~~  
587 ~~influenced by human activity~~. Subphase 4b is characterized by climate change towards warming,  
588 which confirms the gradual shallowing of the lake and increasing the rate of sedimentation. Under  
589 this sub-phase, human impact on the environment is already so great that the picture of climate  
590 change is not clear. There is no doubt, however, that this is a warm period, which should be  
591 correlated with the Medieval Warm Period - MWP (see, Mann et al., 2009).

#### 592 593 *5.4. Phase 5: 780 – 0 cal. BP (1.45- 0 m)*

594 This phase starts about 1200 AD and is connected with the Middle Ages early Modern  
595 Period. Intensive cultivation and treatment of hemp is terminated but cultivation of cereals and  
596 presence of synanthropic plants indicates human activity in a direct vicinity of the lake. The water  
597 level is not high and slightly changes. At 1.4 m there is a drop in TOC, probably due to  
598 deforestation. MS is significantly rising at the same depth as result of increasing input of terrestrial  
599 material to the lake, presumably caused by human activity (deforestation). The intervals of  
600 increased precipitation were reflected by significantly more intensive terrestrial runoff to the lake.  
601 This statement is confirmed by quasi-linear correlation of MS with contents of Fe and Ti in  
602 sediments (Fig. 8). The modern evolution of the lake resulted in development of a shallow (2-3 m)  
603 and gradually overgrowing lake.

604 Phase 5 is a period of increased human activity around the lake, which means that  
605 environmental and climate changes are not so clear. However, changes in lake sedimentation can



606 be seen around 1500, which may be associated with the development of the Little Ice Age (see.,  
607 Büntgen, U., Hellmann, 2014).

608 ~~The presented scenario of environmental changes in the Mlynek Lake and its vicinity during~~  
609 ~~the last ca. 2400 years can be recapitulated in the following way. In the phase 1 (3<sup>rd</sup>-2nd century~~  
610 ~~BC) the lake was surrounded by a dense forest and it was not deep. Increased influx of terrigenous~~  
611 ~~material to the lake can be connected with periods of more intensive local precipitation. A climate~~  
612 ~~was quite warm and wet. The phase 2 (2nd century BC-2nd century AD) is a period of major~~  
613 ~~changes in the environment around the lake, with increasing anthropogenic impact. The forest was~~  
614 ~~much reduced. Intensive human activity is attested by presence of *Cannabis/Humulus*, *Rumex*~~  
615 ~~*acetosella*, *Secale* and cereals undiff. Diatoms indicate a drop of the lake water level. The oldest~~  
616 ~~settlement phase was identified in the stronghold close to the lake (end of the La Tène and the~~  
617 ~~Roman periods). This relatively wet and warm climatic phase should be correlated with so called~~  
618 ~~Roman Climatic Optimum. The phase 3 (2<sup>nd</sup>-9th century AD) indicates gradual restoration of forest~~  
619 ~~communities and absence of synanthropic plants what proves a decline of human settlements~~  
620 ~~around the lake. The middle part of this phase should be associated with the global cooling episode~~  
621 ~~known as Bond 1 (1.5 ka BP). The next phase 4 (5<sup>th</sup>-13th century AD) is expressed by forest~~  
622 ~~clearing restoration around the lake and onset of the next settlement phase. At the end of this phase~~  
623 ~~a defence rampart was raised in the stronghold and a wooden loamy wall was constructed on it.~~  
624 ~~The lower boundary of phase (10<sup>th</sup>-13th century AD) indicates further intensive forest clearing~~  
625 ~~around the lake. Human activity is marked by presence of Gramineae, *Artemisia*,~~  
626 ~~*Cannabis/Humulus*, *Plantago lanceolata*, *Secale* and *Cereale* undiff. It corresponds with a~~  
627 ~~beginning of the next settlement phase in the stronghold (end of 11th century AD) when the next~~  
628 ~~rampart was raised, with wooden constructions at its top. The stronghold was finally abandoned in~~  
629 ~~the first half of the 13th century AD. This period is characterized by climate change towards~~  
630 ~~warming, which confirms the gradual shallowing of the lake (Middle Age warming period). The~~  
631 ~~phase 5 (since 13th century AD up to present) is reflected by intensive cultivation and treatment of~~  
632 ~~hemp and cereals close to the lake during intensive colonisation of Warmia and Masuria by~~  
633 ~~Teutonic state. The water level is not high and changes slightly only, presumably due to~~  
634 ~~reclamation works. The landscape is subjected to strong transformations connected with~~  
635 ~~anthropoppression, resulting in significant deforestation of the area. The landscape is subjected to~~  
636 ~~strong human transformations which means that environmental and climate changes are not so~~



637 clear. However, changes in lake sedimentation can be seen around 1500, which may be associated  
638 with so called Little Ice Age – cold interval.

639 The water level is not high and slightly changes. There is a drop of TOC and rise of MS  
640 caused by increasing input of terrestrial material at 1.4 m depth, resulting presumably from human  
641 deforestation. The small watercourse which enters the Lake from the north – east appeared most  
642 probably during this phase and had the strong impact on the its water environment (see, Bińka et  
643 al, 2020). How it was mentioned, in 15 c. AD a mill was built near the lake using water from the  
644 newly created stream. Damming of the water in the mill reservoir probably contributed to  
645 periodical blooms of dinoflagellate populations in the Lake Młynek. Major blooms of *Tetraedron*  
646 which usually preceding blooms of the dinoflagellate, was most probably main factor that  
647 contributed to the decline of settlement on the stronghold near the shore of the lake (Bińka et al,  
648 2020). Described zone is also characterized by increased precipitation which is reflected by  
649 significantly more intensive terrestrial inflow to the lake and is confirmed by quasi-linear  
650 correlation of MS with contents of Fe and Ti in sediments (Fig. 6). The modern lake is shallow (2-  
651 3 m) and gradually overgrowing. Summing up, the phase 5 is marked by intensive human activity  
652 around the lake and therefore, most environmental and climate changes are obliterated.

## 654 5.2 Development of the Lake Młynek on regional bedground

656 The above scenario seems to be confirmed by earlier paleoenvironmental research  
657 conducted in the southwestern part of the Warmia-Masuria Lake District (Kupryjanowicz, 2008;  
658 Kołaczek et al., 2013). Earlier studies of lake sediments in the Warmia and Mazury Region were  
659 based mainly on palynological examination, ~~a-and the results of pollen analysis make it possible~~  
660 ~~to compare the record from comparyson of the Lake Młynek Młynek Lake sequence with the~~  
661 ~~sequences from the other sites from this region must also be based on palynology~~ (Fig. 12). ~~As it~~  
662 ~~was mentioned, the Lake Młynek located in the wide zone of Lakelands of north-eastern Poland.~~  
663 The closest site Woryty (Pawlikowski et al., 1982, Noryśkiewicz and Ralska-Jasiewiczowa 1989,  
664 Ralska-Jasiewiczowa and Latałowa, 1996), ca. 35 km in a straight line to the east is a reference for  
665 this area. The paleoenvironmental records delivered by the ~~Młynek LakeLake Młynek~~ core is very  
666 similar to the Woryty palynological succession with the human impact during the Roman period  
667 and the Medieval time. More detailed comparison is impossible, because of low resolution of the

668 pollen spectrum at Woryty. The [second close site with the information about vegetation history is](#)  
669 Lake Družno, [located in the Vistula Delta depression](#) ca. 35 km to the north (Zachowicz et al. 1982,  
670 Zachowicz and Kępińska 1987, Miotk-Szpiganowicz et al. 2008), ~~is the second closest site with~~  
671 ~~palynological examination to the Młynek Lake.~~ ~~Unfortunately the data from this lake are in~~ Low  
672 resolution and ~~there is no~~ ~~lack of~~ age-depth model. ~~This causes from this lake makes that the~~  
673 comparison of pollen results between these two sections difficult ~~and rather superficial.~~ ~~Despite~~  
674 ~~this and habitat differences between Lake Družno~~ ~~Even though the Družno and~~ Lake is located in  
675 ~~the Vistula Delta depression,~~ Młynek the pollen record for ~~both sites~~ during the last 2400 years is  
676 similar ~~to the Młynek Lake one and~~ shows ~~with~~ presence of human indicators during the Roman  
677 ~~period and~~ human impact marked out during the Medieval time ~~and presence of human indicators~~  
678 ~~during the Roman period.~~ Differences in natural vegetation are local and especially exposed in  
679 higher share of alder in pollen diagram from the ~~Družno~~ Lake ~~Družno and~~, most probably caused  
680 by wet habitats in the Vistula Delta. In the 2013 year were published ~~New~~ ~~new~~ palynological data  
681 from the ~~Łańskie Lake~~ Lake Łańskie (Madeja, 2013), located ca. 55 km to the south-east from the  
682 ~~Lake Młynek~~ Młynek Lake. ~~The results of this investigation~~ show higher percentages of pine and  
683 lower share of beech ~~than from the Lake Młynek.~~. This ~~record results divergences~~ probably ~~are~~ not  
684 only ~~from different~~ ~~due to different location and~~ environmental conditions in the lake vicinity but  
685 also ~~(most of all)~~ different ~~size surface~~ of the lakes. The ~~Młynek Lake~~ Lake Młynek is a very small  
686 (ca. 0.7 km<sup>2</sup>) ~~and~~ mid-forest basin, whereas the ~~Łańskie Lake~~ Lake Łańskie area is over 10 km<sup>2</sup>  
687 and shows much more regional pollen record. Based on periodical appearances of plant human  
688 indicators and archaeological data between 300 BC and 800 AD Madeja (2013) distinguished three  
689 human phases of West Baltic Barrow, Wielbark and Prussian cultures. In the palynological diagram  
690 from the ~~Lake Młynek~~ Młynek Lake (Phase 2) the first is indicated only, including termination of  
691 the La Tene and the Roman Period. Significant growth of human indicators from ~~1000 yr~~ ~~the~~  
692 ~~beginning of XI century.~~ AD is visible in diagrams from both sites. A more local record from the  
693 ~~Lake Młynek~~ Młynek Lake is marked especially by high percentage of *Humulus/Cannabis* pollen  
694 grains (up to 25%), in 13-15th centuries. In the sediments of the ~~Łańskie Lake~~ Lake Łańskie,  
695 presence of pollen grains of hemp was discontinuous and not exceeded 1%.

696 Numerous pollen data are available from the area adjacent to the south-west. The  
697 investigation from the Brodnica Lake District i.e. Strażym Lake (Noryskiewicz, 1987,  
698 Noryskiewicz and Ralska-Jasiewiczowa 1989), Oleczno Lake (Filbrandt-Czaja, 1999, Filbrandt-

699 Czaja et al. 2003) and Chełmno Lakeland (Noryskiewicz 2013). ~~presents human activity in the~~  
700 ~~Neolithic~~. Palynological record from this region evidenced settlement during La Tene, Roman and  
701 Medieval periods. Comparison of the pollen record from other sites located to the east of the ~~Lake~~  
702 ~~Młynek~~ ~~Młynek Lake~~ shows differences in share of a beech. The content of *Fagus sylvatica* pollen  
703 grains changes in the north-eastern direction and significantly high content of *Fagus sylvatica* in  
704 the Młynek Lake sediments is caused by a very local record from a small lake. Decline of *Fagus*  
705 *sylvatica* is related to continental climate and is visible in a pollen diagram from ~~Lake~~ Salet ~~Lake~~  
706 (Szal et al. 2014a), ~~Lake~~ Mikołajki ~~Lake~~ (Ralska-Jasiewiczowa 1989), ~~Lake~~ Żabińskie ~~Lake~~  
707 (Wacnik et al. 2016) and ~~Lake~~ Wigry ~~Lake~~ (Kupryjanowicz 2007). Simultaneously with beech  
708 decline, a share of *Picea abies* increases. A record of human activity in palynological spectra from  
709 eastern Poland was noted in many sites. There is similarity between pollen records from the ~~Lake~~  
710 Młynek ~~Lake~~ and far away over 100 km to the east in the Masurian Lakes: Wojnowo, Miłkowskie  
711 and Jędzelek (Wacnik et al. 2014). Recorded shorter or longer human impact on vegetation during  
712 Roman Period and Medieval time is divided by ca. 500-600 years without cultivation and with  
713 natural reforestation (and strong share of birch, a pioneer tree). Similar duration of human  
714 regression in the Lake Młynek profile began and terminated earlier than recorded in the lakes  
715 Wojnowo or Miłkowskie. Different history of human activity shows the results from the Lake Salet  
716 (Szal et al. 2014b). Pollen grains of cultivated and ruderal plants are present continuously from the  
717 early Iron Age to the early Medieval time. In opposite to the ~~pollen record from the lakes: Młynek,~~  
718 ~~Lake or Wojnowo and Miłkowskie pollen record~~, the suggested constant settlement in the  
719 neighborhood of the Salet Lake occurred with a very short decline of human impact only in 880-  
720 980 AD (Szal et al. 2014a). ~~Cited examples of palynological reconstruction of vegetation changes~~  
721 ~~under climatic conditions and human impact reflect differences between a record from the Młynek~~  
722 ~~Lake and much larger and predisposed regional view of environmental history.~~

723

## 724 5. Conclusion.

725 1. Że zapis najwyraźniejszych zmian w środowisku jest związany z ingerencją człowieka, którego  
726 aktywność zwłaszcza w okresie okolożymskim jest zintensyfikowana sprzyjającymi warunkami  
727 klimatycznymi.

728 2. Że obecność człowieka wyrażona palino jest zbieżna z ustaleniem, danymi archeo odnośnie  
729 obecności grodziska i mimo większej lokalności koreluje z danymi z innych stanowisk o bardziej  
730 regionalnym charakterze

731 3. Że zmiany w samym jeziorze zrekonstruowane okrzemkowo wskazują na wahania poziomu  
732 wody w jeziorze i korelują się z człowiekiem, jednocześnie wskazując na prawdopodobne  
733 zwilgotnienia klimatu związane z chłodniejszymi fazami klimatu.

## 734 **6. Conclusions**

735 6. 1. Based on results of lithological, geochemical, palynological and diatomological analysis,  
736 supplemented with archaeological data, five main environmental phases of the Lake Młynek  
737 development were distinguished (Fig. 10). Radiocarbon ages enabled detailed chronology whereas  
738 pollen data and stratigraphy of the stronghold to the north-east of the lake made correlation of  
739 human activity with environmental data possible for the last 2300 years. From the 1 century BC to  
740 2<sup>nd</sup> century AD the forest around the lake was much reduced, what can be associated with pre  
741 roman and Roman occupation phase (attested also on the stronghold located close to the lake).  
742 From the 2nd to 9th century AD is attested gradual restoration of the forest and decline of human  
743 activity along with lake which is deepening due to the advent of more wet climatic conditions. This  
744 colder and humid phase corresponded to the Bond 1 Event (1.5 ka BP) cooling episode. Intensive  
745 forest clearing around the lake occurred in the 9th – 13th century AD as result of next phase human  
746 activity. This period is marked by warming confirmed by a gradual shallowing of the lake (Middle  
747 Age Warm Period). In next 5 strong human impact transformed the local landscape, especially  
748 construction and activity small mill since 15 c. AD. This caused that possible climate-induced  
749 natural environmental changes are not so clear.

750 6. 2. Environmental transformations recorded in bottom lake sediments of the Lake Młynek were  
751 highly dependent on human activity and were especially intensive in the Roman and Middle Age  
752 periods due to favourable climatic conditions.

753 6. 3. Human colonisation deduced from a pollen record of the Lake Młynek is coincident with  
754 archaeological data, including existence of a stronghold and in spite of a local character, it  
755 correlates well with data from other, more regionally significant palynological sites.

756 4. Transformations of the Młynek lake reconstructed based on diatom analysis, not only indicate  
757 changes of the lake water level and correspond with a human impact but also determine episodes  
758 of more humid climate during coolings.

759  
760  
761  
762  
763  
764  
765  
766  
767  
768  
769  
770  
771  
772  
773  
774  
775  
776  
777  
778  
779  
780  
781  
782  
783  
784  
785  
786  
787  
788

**Acknowledgments**

The research project has been funded by the National Science Centre in Poland – project: UMO-2016/21/B/ST10/03059: *Correlation of prehistoric and early medieval settlement phases in north-east Poland with the changes of the natural environment in the light of lacustrine sediments study.*

**References:**

Ahlgren, J., Reitzel, K., De Brabandere, H., Gogoll, A., Rydin, E.: Release of organic P forms from lake sediments, *Water Research*, 45, 565-72. 2011.

Bauer, A., Velde, B.: *Geochemistry at the Earth’s Surface Movement of Chemical Elements*. Springer – Verlag Berlin Heidelberg, 2014.

Bińka, K., Cieśla, A., Łącka, B., Madeyska, T., Marciniak, B., Szeroczyńska, K., Więckowski, K.: The development of Błędowo Lake (Central Poland) - A palaeoecological study, *Studia Geologica Polonica*, 100, 1-83, 1991.

[Bińka, K., Welc, F., Nitychoruk, J., Sieradz, D., Lewczuk, A: Unique finds in palynological spectra: acetolyze resistant vegetative forms of freshwater dinofagellate based on the Lake Młynek record from northeastern Poland, \*Studia Quaternaria\* 37/2, 59-67. 2020.](#)

Blaauw, M., Christen, J.A.: Flexible Paleoclimate Age-Depth Models Using an Autoregressive Gamma Process, *Bayesian Analysis* 6/3, 457–474. 2011

Blaauw, M., Christen, J.A., Mauquoy, D., van der Plicht, J., Bennett, K.D.: Testing the timing of radiocarbon dated events between proxy archives, *The Holocene* 17, 283-288, 2007.

Bloemdal, J., deMenocal, P.: Evidence for a change in the periodicity of tropical climate cycles at 2,4 Myr from whole – core magnetic susceptibility measurements, *Nature* 342, 897- 900, 1989.

Bojakowska, I.: Phosphorous in lake sediments of Poland – results of monitoring research, *Limnological Review*, 16, 15-25, 2016.

789 Brauer, A.: Annually laminated lake sediments and their palaeoclimatic relevance. In: The  
790 Climate in Historical Times. Towards a Synthesis of Holocene Proxy Data and Climate  
791 Models. GKSS School of Environmental Research, 111-129, edited by: Fischer, H.,  
792 Kumke, T., Lohmann, G., Flöser, G., Miller, H., von Storch, H., Negendank, J.F.W.,  
793 Springer Verlag, 2004.

794 Brauer, A., Dulski, P., Mangili, C., Mingram, J., Liu, J.: The potential of varves in high-  
795 resolution paleolimnological studies, *PAGES News* 17 (3), 96-98, 2009.

796 Brenner M., Whitmore T.J., Curtis J.H., Hodell D.A., Schelske, C.L.: Stableisotope (d13C  
797 and d15N) signatures of sedimented organic matter as indicators of historic lake trophic  
798 state, *J. Paleolimnol.*, 22, 205-221, 1999.

799 Büntgen, U., Hellmann, L., The Little Ice Age in Scientific Perspective: Cold Spells and  
800 Caveats, *Journal of Interdisciplinary History* 44:3, 353–368, 2014.

801 Czymzik, M., Dulski, P., Plessen, B., von Grafenstein, U., Naumann, R., Brauer, A.: A 450-  
802 year record of spring-summer flood layers in annually laminated sediments from Lake  
803 Ammersee (southern Germany), *Water Resour. Res.*, 46, W11528, 2010.

804 Dearing, J. A.: Environmental magnetic susceptibility: using the Bartington MS2, 1994.

805 Douglas, M.S.V., Smol, J.P.: Freshwater diatoms as indicators of environmental change in  
806 the High Arctic, 227–244, in: *The Diatoms: Applications for the Environmental and Earth*  
807 *Sciences*, edited by: Stoermer, E.F., Smol, J.P., Cambridge Univ. Press, Cambridge, 1999.

808 Duff, K.E., Zeeb, B.A., Smol, J.P.: *Atlas of Chrysophycean Cysts*, 2. Kluwer Academic  
809 Publishers, Dordrecht-Boston-London, 1995.

810 Duff, K.E., Zeeb, B.A., Smol, J.P.: Chrysophyte cyst biogeographical and ecological  
811 distributions: a synthesis, *Journal Biogeography* 24, 791–812, 1997

812 Elbert, J., Grosjean, M., von Gunten, L., Urrutia, R., Fischer, D., Wartenburger, R.,  
813 Ariztegui, D., Fujak, M., Hamann, Y.: Quantitative high-resolution winter (JJA)  
814 precipitation reconstruction from varved sediments of Lago Plomo 47°S, Patagonian  
815 Andes, AD 1530-2001, *Holocene* 22 (4), 465-474, 2012.

816 Filbrandt-Czaja A.: Zmiany szaty roślinnej okolic jeziora Oleczno w późnym holocenie  
817 pod wpływem czynników naturalnych i antropogenicznych, in: *Studia nad osadnictwem*  
818 *średniowiecznym ziemi chełmińskiej* 3, 61–68, edited by: W. Chudziak, Toruń, 1999.

819 Filbrandt-Czaja A., Noryśkiewicz B., Piernik A.: Intensification gradient of settlement  
820 processes in pollen diagrams from Dobrzyńsko- Olsztyńskie Lake District, *Ecol. Quest.*, 3,  
821 125-137, 2003.

822 Snowball, I.: Mineral magnetic properties of Holocene lake sediments and soils from the  
823 Karsa Valley, Lappland, Sweden, and their relevance to paleoenvironmental reconstruction,  
824 *Terra Nova* 5, 258-270, 1993.

825 Francus, P., von Suchodoletz, H., Dietze, M., Donner, R.V., Bouchard, F., Roy, A.-J.,  
826 Fagot, M., Verschuren, D., Kröopelin, S.: Varved sediments of Lake Yoa (Ounianga Kebir,  
827 Chad) reveal progressive drying of the Sahara during the last 6100 years, *Sedimentology*  
828 60 (4), 911-934, 2013.

829 Gałązka, D.: Szczegółowa mapa geologiczna Polski 1:50 000, ark. Iława (210). *Centr.*  
830 *Arch. Geol. Państw. Inst. Geol.*, [Detailed Geological Map of Poland, scale 1:50 000, Iława  
831 sheet (210). Warsaw, 2009.

832 Givélet, N., Le Roux, G., Cheburkin, A., Chen, B., Frank, J., Goodsite, M. E., Kempter,  
833 H., Krachler, M., Noernberg, T., Rausch, N., Rheinberger, S., Roos-Barraclough, F.,  
834 Sapkota, A., Scholzb, Ch., Shoty, W.: Suggested protocol for collecting, handling and  
835 preparing peat cores and peat samples for physical, chemical, mineralogical and isotopic  
836 analyses. *J. Environ. Monit.*, 6, 481–492, 2004.

837 ~~Goldhaber, M.B.: Sulfur-rich sediments, in: *Treatise on Geochemistry*, edited by: Holland,~~  
838 ~~H.D., Turekian, K.K., Pergamon, Oxford, 257-288, 2003.~~

839 Grążawski, K.: Z najnowszych badań pogranicza słowiańsko-pruskiego w rejonie iławsko-  
840 lubawskim. *Pruthenia*, vol. II, Olsztyn, 2006.

841 Hofmann, G., Werum, M., Lange-Bertalot, H.: Diatomeen im Süßwasser-Benthos von  
842 Mitteleuropa. A.R.G. GantnerVerlag, Rugell, Liechtenstein, 1–908, 2011.

843 Holmes J.A., De Decker P.: The chemical composition of ostracod shells: application in  
844 Quaternary paleoclimatology, in: *Ostracoda as proxies for Quaternary climate change*,  
845 *Developments in Quaternary Science* 12, 131-140, edited by: Horne D., Holmes J.A.,  
846 Rodriguez-Lazaro J. & Viehberg F., 2012.

847 Hunter, L. E., Delaney, A. J., Lawson, D. E. Davis, L.; Downhole GPR for high-resolution  
848 analysis of material properties near Fairbanks, Alaska, in: *Ground Penetrating Radar in*



849 Sediments, Geological Society, Special Publications 211, 275-285, edited by: Bristow, C.  
850 S., Jol, H. M., London, 2003.

851 Ivanić, M., Lojen, S., Grozić, D., Jurina, I., Škapin, S.D., Troškot-Čorbić, T., Mikac, N.,  
852 Juračić, M.: Geochemistry of sedimentary organic matter and trace elements in modern lake  
853 sediments from transitional karstic land–sea environment of the Neretva River delta (Kuti  
854 Lake, Croatia), Quaternary International, 494, 286-299, 2018.

855 Jelinowska, A., Tucholka, P., Wieckowski, K.: Magnetic properties of sediments in a Polish  
856 lake: evidence of a relation between the rock-magnetic record and environmental changes  
857 in Late Pleistocene and Holocene sediments, Geophys. J. Int., 129,727-736, 1997.

858 Karst-Riddoch, T.L., Pisaric, M.F.J., Smol, J.P.: Diatom responses to 20th century climate-  
859 related environmental changes in high elevation mountain lakes of the northern Canadian  
860 Cordillera, Journal of Paleolimnology 33, 265–282, 2005.

861 Kilham, P., Kilham, S.S., Hecky, R.E.: Hypothesized resource relationships among African  
862 planktonic diatoms, Limnology and Oceanography 31, 1169–1181, 1986.

863 Jutrzenka – Trzebiatowski, A., Hołdyński, A.: Roślinność rzeczywista Parku  
864 Krajobrazowego Pojezierza Iławskiego. Akademia Rolniczo-Techniczna. Olsztyn: 1 – 36,  
865 1997.

866 Kołaczek, P., Kuprjanowicz, M., Karpińska -Kołaczek, M., Szal, M., Winter, H., Danel,  
867 W., Pochocka, -Szwarc, K, Stachowicz – Rybka, R.: The Late Glacial and Holocene  
868 development of vegetation in the area of a fossil lake in the Skaliska Basin (north-eastern  
869 Poland) inferred from pollen analysis and radiocarbon dating, Acta Palaeobot., 53(1), 23–  
870 52, 2013.

871 Kondracki, J.: Geografia regionalna Polski. Wyd. Nauk. PWN, Warszawa, 2002.

872 Kraska M., Piotrowicz R.: Lobelia lakes: specificity, trophy, vegetation and protection, in:  
873 protection of beds and wetlands of Pomerania region 3, 48-52, edited by: Malinowski B.,  
874 2000.

875 Kuprjanowicz, M.: Badania palinologiczne w Polsce północno-wschodniej, in: Człowiek i  
876 jego środowisko (Polska północno-wschodnia w holocenie), Botanical Guidebooks 30, 77–  
877 95, edited by: Wacnik A., Madeyska, 2008.

878 Kuprjanowicz, M.: Postglacial development of vegetation in the vicinity of the Wigry  
879 Lake, Geochronometria 27, 53-66, 2007.

880 Lin, Y.T., Schuettpelez, C.C., Wu, C.H., and Fratta, D.: A combined acoustic and  
881 electromagnetic wave-based techniques for bathymetry and subbottom profiling in shallow  
882 waters, *Journal of Applied Geophysics*, 68, 203–218, 2009.

883 López, P., Navarro, E., Marce, R., Ordoñez, J., Caputo, L., Armengol, J.: Elemental ratios  
884 in sediments as indicators of ecological processes in Spanish reservoirs, *Limnetica* 25, 499–  
885 512, 2006.

886 Ma, L., Wu, J., Abuduwaili, L., Liu, W.: Geochemical Responses to Anthropogenic and  
887 Natural Influences in Ebinur Lake Sediments of Arid Northwest China, *Plos One*,  
888 13/11(5):e0155819: doi: 10.137, 2016.

889 Madeja J.: Vegetation changes and human activity around Lake Łańskie (Olsztyn Lake  
890 District, NE Poland) from the mid Holocene, based on palynological study, *Acta*  
891 *Palaeobotanica* 53(2), 235–261, 2013.

892 Mann, M. E., Zhang, Z., Rutherford, S., et al.: (2009). Global Signatures and Dynamical  
893 Origins of the Little Ice Age and Medieval Climate Anomaly, *Science*. 326 (5957), 1256–  
894 60, 2009.

895 McCormick, M., Büntgen, U., Cane, M.A., Cook, E.R., Harper, K., Huybers, P., Litt, T.,  
896 Manning, S.W., Mayewski, P. A., More, A.F.M., Nicolussi, K., Tegel, W.: Climate Change  
897 during and after the Roman Empire: Reconstructing the Past from Scientific and Historical  
898 Evidence, *Journal of Interdisciplinary History* 43:2 (Autumn, 2012), 169–220.

899 Miotk-Szpiganowicz, G., Zachowicz, J., Uścińowicz, S.: Review and reinterpretation of the  
900 pollen and diatom data from the deposits of the Southern Baltic lagoons, *Polish Geological*  
901 *Institute Special Papers*, 23, 45–70, 2008.

902 Myers, K.J., Wignall, P.: Understanding Jurassic Organic-rich Mudrocks—New Concepts  
903 using Gamma-ray Spectrometry and Palaeoecology: Examples from the Kimmeridge Clay  
904 of Dorset and the Jet Rock of Yorkshire, in: *Marine Clastic Sedimentology*, 172-189, edited  
905 by: J.K., Legett, G., Zauffa, 1987.

906 Nitychoruk, J. Welc, F.: Janiki Wielkie. Środowisko Fizyczne – geograficzne, in: *Katalog*  
907 *Grodzisk Warmii i Mazur*, tom 2, 153 – 155, edited by: Kobyliński, Z., Warszawa, 2017.

908 Noryśkiewicz, B.: Lake Steklin - a reference site for the Dobrzyń-Chełmno Lake District,  
909 N Poland, Report on palaeoecological studies for the IGCP-Project No. 158B, *Acta*  
910 *Palaeobot.*, 22(1), 65-83, 1982.

911 Noryskiewicz A. M.: Historia roślinności i osadnictwa Ziemi Chełmińskiej w późnym  
912 holocenie, Studium palinologiczne, Toruń, 2013.

913 Noryskiewicz, B.: History of vegetation during the Late-Glacial and Holocene in Brodnica  
914 Lake District in light of pollen analysis of Lake Strażym deposits, *Acta Palaeobot.*, 27(1),  
915 283-304, 1987.

916 Noryskiewicz, B., Ralska-Jasiewiczowa, M.: Type region P-w: Dobrzyń-Olsztyn lake  
917 District, *Acta Palaeobotanica* 29(2), 85-93, 1989.

918 Ojala, A.E.K., Kosonen, E., Weckström, J., Korkonen, S., Korhola, A.: Seasonal formation  
919 of clastic-biogenic varves: the potential for palaeoenvironmental interpretations, *GFF*,  
920 Special issue: Varve Genesis Chronol., *Paleoclimate* 135 (3/4), 237-247, 2013.

921 Pawlikowski M., Ralska-Jasiewiczowa M., Schönborn W., Stupnicka E., Szeroczyńska K.:  
922 Woryty near Gietrzwałd, Olsztyn Lake District, NE Poland - history and lake development  
923 during the last 12000 years, *Acta Palaeobotanica* 22(1), 85-116, 1982.

924 Peck, J. A., King, J. W., Colman, S. M., Kravchinsky, V. A.: 1994. A rock magnetic record  
925 from lake Baikal, Syberia: Evidence for Late Quaternary climate change, *Earth. Planet. Sci.*  
926 *Lett.*, 122, 221-238, 1994.

927 Rabiega, K., Rutyna, M., Wach, D.: Janiki Wielkie. Badania Archeologiczne, w: Katalog  
928 Grodzisk Warmii i Mazur, tom 2. Warszawa, 155 – 174, edited by: Kobylński, Z.,  
929 Warszawa, 2017.

930 Ralska-Jasiewiczowa M.: Type region P-x: Masurian Great Lake Dystrykt. *Acta*  
931 *Palaeobotanica* 29(2), 95-100, 1989.

932 Ralska-Jasiewiczowa M., Latałowa A.: Poland, in: *Palaeoecological events during the Last*  
933 *15,000 years: Regional Synthesis of Palaeoecological Studies of Lakes and Mires in*  
934 *Europe*, 403-472, edited by: Berglund, B.E., Birks H.J.B., Ralska-Jasiewiczowa, M.,  
935 Wright H.E., John Wiley & Sons: Chichester, 1996.

936 Ralska-Jasiewiczowa M, Goslar T, Madeyska T, Starkel L.: Lake Gościąż, Central Poland,  
937 a monographic study, W. Szafer Institute of Botany, Polish Academy of Sciences, Kraków,  
938 1998.

939 ~~Sageman B.B., Lyons T.W.: Geochemistry of fine grained sediments and sedimentary~~  
940 ~~rocks, in: Treatise on Geochemistry, edited by: Holland, H.D., Turekian, K.K., Pergamon,~~  
941 ~~Oxford, 115-158, 2003.~~

942 Sambuelli, L., Silvia, S.: Case study: A GPR survey on a morainic lake in northern Italy for  
943 bathymetry, water volume and sediment characterization, *Journal of Applied*  
944 *Geophysics* 81, 48-56, 2012.

945 Sambuelli, L., Calzoni, C., Pesenti, M.: Case history: Waterborne GPR survey for  
946 estimation bottom-sediment variability: A survey on the Po River, Turin, Italy, *Geophysics*  
947 74, 95–102, 2009.

948 Sandgren, P., Snowball, I.: Application of mineral magnetic techniques to Paleolimnology,  
949 in: *Tracking environmental change using lake sediments, Physical and geochemical*  
950 *methods 2*, edited by: Last, W., Smol, J., Kluwer Academic Publishers. Netherlands, 2001.

951 Smol, J.P., Birks, J.B., Last, W.M.: *Tracking Environmental Change Using Lake*  
952 *Sediments, Terrestrial, Algal and Siliceous Indicators 3*, 371, Springer Verlag, 2001.

953 Snowball, I. F.: Mineral magnetic properties of Holocene lake sediments and soils from the  
954 Karsa valley, Lappland, Sweden, and their relevance to palaeoenvironmental  
955 reconstruction, *Terra Nova* 5, 258 – 270, 1993.

956 Stankevica, K., Kalnina, L., Klavins, M., Cerina, A., Ustupe, L., Kaup, E.: Reconstruction  
957 of the Holocene Palaeoenvironmental Conditions Accordingly to the Multiproxy  
958 Sedimentary Records from Lake Pilvelis, Latvia, *Quaternary International* 386, 102-15,  
959 2015.

960 [Stopa – Boryczka, M., Boryczka, J., Wawer, J., Grabowska, K., Dobrowolska, M.,](#)  
961 [Oswiec, M., Błażek, E., Skrzypczuk, J., Grzęda.: Climate of north – eastern Poland based](#)  
962 [on J. Kondracki and J. Ostrowski`s Physiographic division. Atlas of interdependence of](#)  
963 [meteorological and geographical parameters in Poland. Warsaw University, Warsaw, 2013.](#)

964 Szal M., Kupryjanowicz M., Wyczółkowski M.: Late Holocene changes in vegetation of  
965 the Mrągowo Lakeland (NE Poland) as registered in the pollen record from Lake Sałęt,  
966 *Studia Quaternaria*, 31(1), 51–60, 2014a.

967 Szal M., Kupryjanowicz M., Wyczółkowski M., Tylmann W.: The Iron Age in the  
968 Mrągowo Lake District, Masuria, NE Poland: the Sałęt settlement microregion as an  
969 example of long-lasting human impact on vegetation. *Veget. Hist. Archaeobot.*, 23, 419–  
970 437, 2014b.

971 Szczepański, S.: Średniowieczne założenia obronne okolic Zalewa, *Zapiski Zalewskie* 16,  
972 2009.

973 Thompson, R., Oldfield, F.: Environmental magnetism, Allen and Unwin London, 1986.  
974 Tiljander, M., Ojala, A.E.K., Saarinen, T., Snowball, I.: Documentation of the physical  
975 properties of annually laminated (varved) sediments at a sub-annual to decadal resolution  
976 for environmental interpretation, *Quat. Int.*, 88 (1), 5-12, 2002.  
977 Tylmann, W., Szpakowska, K., Ohlendorf, C., Woszczyk, M., Zolitschka, B.: Conditions  
978 for deposition of annually laminated sediments in small meromictic lakes: a case study of  
979 Lake Suminko (northern Poland), *J. Paleolimnol.*, 47 (1), 55-70, 2012.  
980 Valpola, S.E., Ojala, A.E.K.: Post-glacial sedimentation rate and patterns in six lakes of the  
981 Kokemäenjoki upper watercourse, Finland, *Boreal Environ. Res.*, 11, 195-211, 2006.  
982 Verosub, K. L., Roberts, A. P.: Environmental Magnetism: past, present and future, *Journal*  
983 *of Geophysical Research* 100, 2175-2192, 1995.  
984 Wacnik A, Tylmann W, Bonk A et al., Determining the responses of vegetation to natural  
985 processes and human impacts in north-eastern Poland during the last millennium:  
986 Combined pollen, geochemical and historical data, *Vegetation History and Archaeobotany*.  
987 Epub ahead of print 17 March. DOI: 10.1007/s00334-016-0565-z, 2016.  
988 Wacnik A., Kupryjanowicz M., Mueller-Bieniek A., Karczewski M., Cywa K.: The  
989 environmental and cultural contexts of the late Iron Age and medieval settlement in the  
990 Mazurian Lake District, NE Poland: combined palaeobotanical and archaeological data,  
991 *Veget. Hist. Archaeobot.*, 23, 439–459, 2014.  
992 Welc, F.: Lake sediments and geoarchaeology (editorial), *Studia Quaternaria* 34(1), 3-8,  
993 2017.  
994 Welc, F.: Geoarchaeological evidence of late and post-Antiquity (5<sup>th</sup>-9<sup>th</sup> c. AD) climate  
995 changes recorded at the Roman site in Plemići Bay (Zadar region, Croatia), *Studia*  
996 *Quaternaria* 36, no. 1, 3–17, 2019.  
997 Wetzel, R.G.: Past productivity: paleolimnology, in: *Limnology. Lake and River*  
998 *Ecosystems*, third ed., edited by: Wetzel, R.G., Elsevier, Oxford, 785-804, 2001.  
999 Wilkinson, A.N., Zeeb, B.A., Smol, J.P.: *Atlas of chrysophycean cysts*, Kluwer Academic  
1000 Publishers, Dordrecht, 2002.  
1001 Williams, D.M., Round, F.E.: Revision of the genus *Fragilaria*, *Diatom Research* 2, 267–  
1002 288, 1987.

1003 Wirth S.B., Gilli A., Niemann H., Dahl T.W., Ravasi D., Sax N., Hamann Y., Peduzzi R.,  
1004 Peduzzi S., Tonolla M., Lehmann M.F., Anselmetti F.S.: Combining sedimentological,  
1005 trace metal (Mn, Mo) and molecular evidence for reconstructing past water-column redox  
1006 conditions: the example of meromictic Lake Cadagno (Swiss Alps), *Geochimica et*  
1007 *Cosmochimica Acta*, 120, 220-238, 2013.

1008 Witkowski, A., Lange-Bertalot, H., Metzeltin, D.: Diatom flora of marine coasts, I.  
1009 *Iconographia Diatomologica* 7, 1–925, 2000.

1010 Zachowicz J., Kępińska U.: The palaeoecological development of Lake Drużno (Vistula  
1011 Deltaic Area), *Acta Palaeobotanica* 27(1), 227-249, 1987.

1012 Zachowicz J., Przybyłowska-Lange W., Nagler J.: The Late-glacial and Holocene  
1013 vegetational history of the Żuławy region, N Poland, A. Biostratigraphic study of Lake  
1014 Drużno sediments, *Acta Palaeobotanica* 22(1), 141-161, 1982.

1015 Zalat, A., Welc, F., Nitychoruk, J., Marsk, L., Chodyka, M., Zbucki, Ł.: Last two millennia  
1016 water level changes of the Młynek Lake (Northern Poland) inferred from diatoms and  
1017 chrysophyte cysts record, *Studia Quaternaria* 35/2, 77 – 89, 2018.

1018 Zolitschka, B.: Varved lake sediments, in: *Encyclopedia of Quaternary Science*, edited by:  
1019 Elias, S.A., Elsevier, Amsterdam, 3105-3114, 2007.

1020

1021

1022

1023

1024

1025

1026

1027

1028

1029

1030

1031

1032

1033
